# Supplementary material for: Further evidence that mechanisms of host/symbiont integration are dissimilar in the maternal versus embryonic Acyrthosiphon pisum bacteriome
Source: PubMed Central journal article supplement (PMC7654044; doi:10.1186/s13227-020-00168-5), 2020-11-10
Supplement: 13227_2020_168_MOESM6_ESM.pdf [file 13227_2020_168_MOESM6_ESM.pdf]

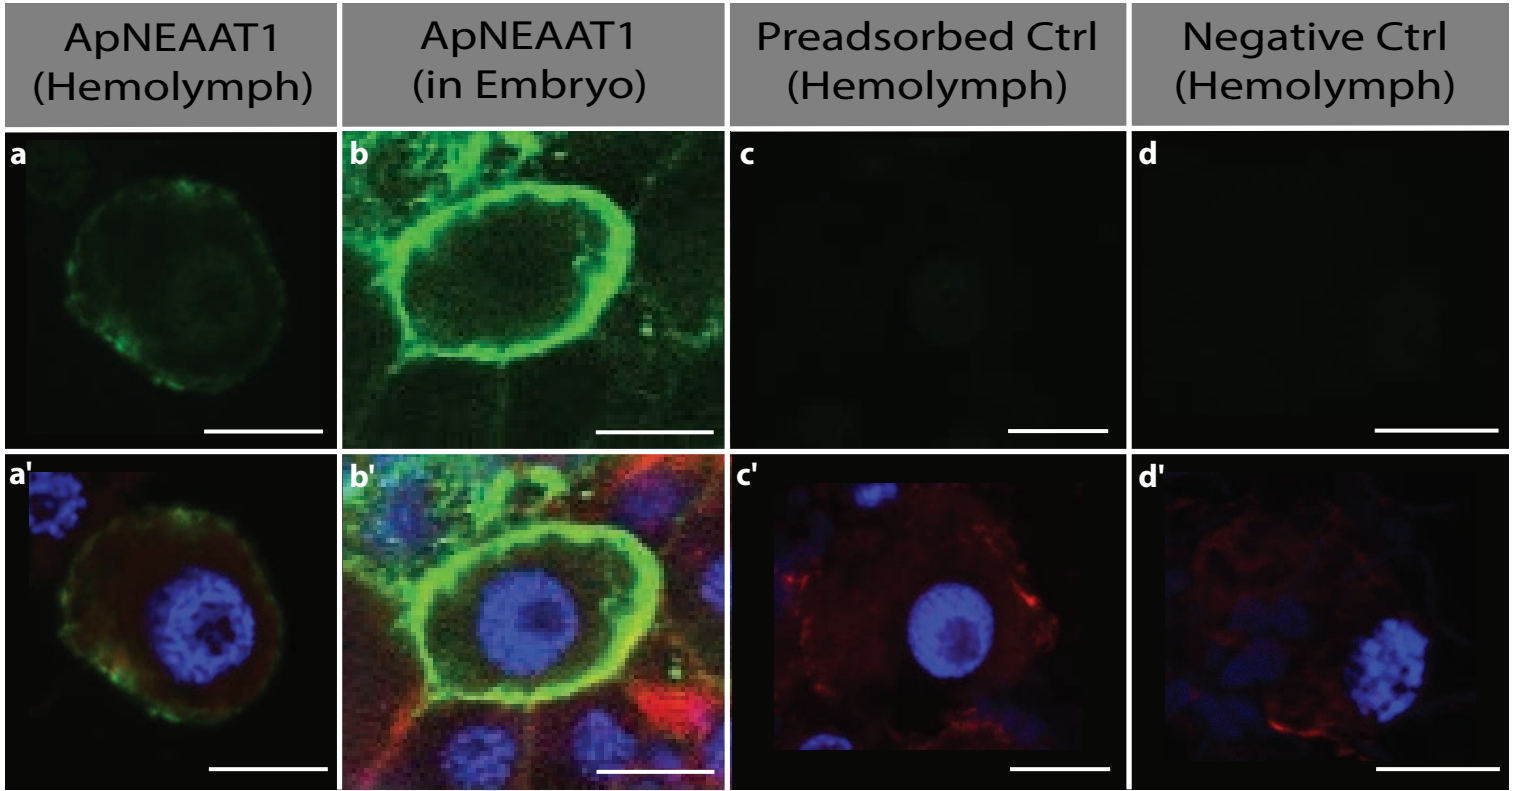

■ ApNEAAT1   
 ■ F-actin   
 ■ Nuclei
